# Supplementary material for: Variations in the breeding behavior of cichlids and the evolution of the multi-functional seminal plasma protein, seminal plasma glycoprotein 120
Source: Springer Nature journal article supplement (doi:10.1186/s12862-018-1292-0), 2018-12-01
Supplement: 12862_2018_1292_MOESM5_ESM.pdf [file 12862_2018_1292_MOESM5_ESM.pdf]

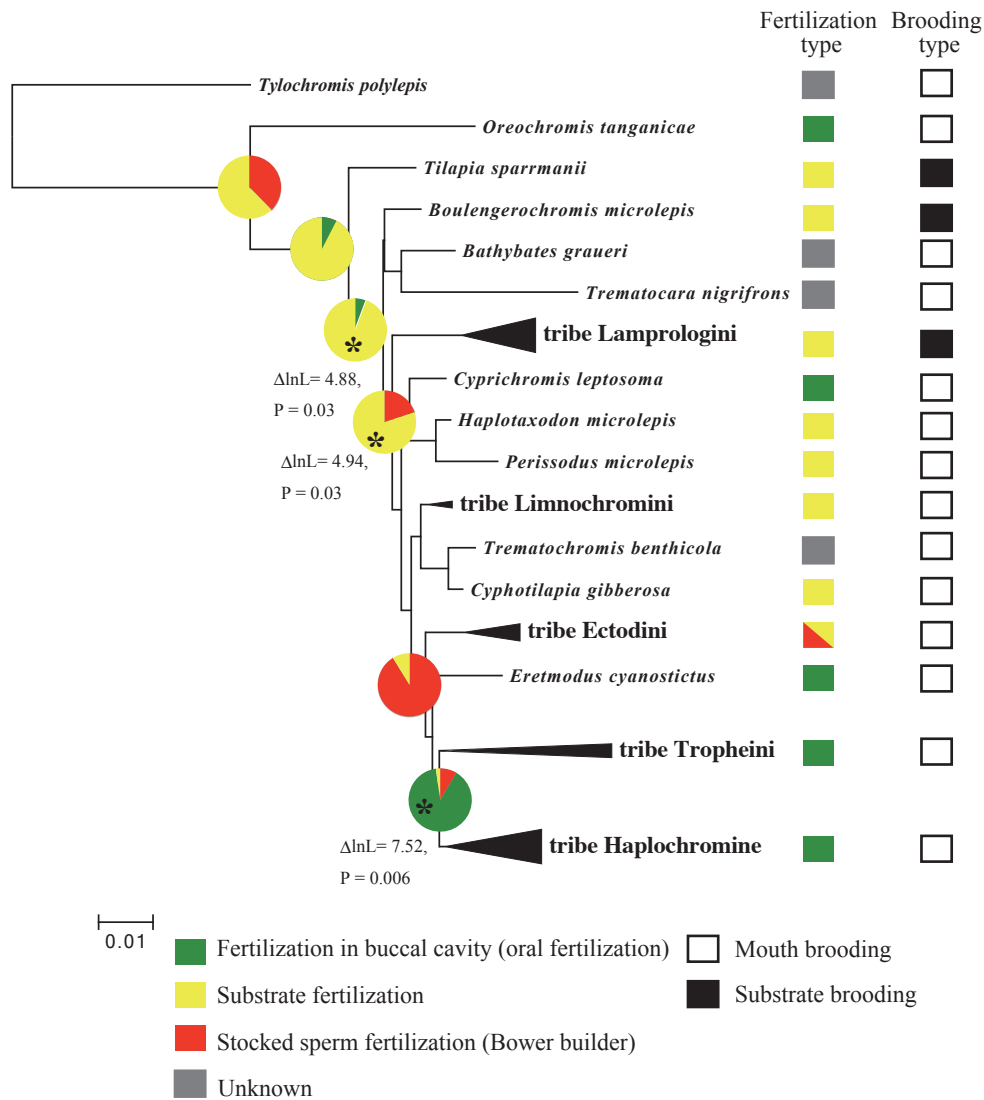

### Figure S1 Distinct fertilization types in Lake Tanganyikan cichlids and ancestral reconstruction

**of fertilization types** Fertilization types were categorized into three types: 1) fertilization in the buccal cavity (oral fertilization) in mouth brooders, 2) stocked-sperm fertilization in bower-building mouth brooders, and 3) substrate fertilization in mouth brooders or substrate brooders. Maximum likelihood of the phylogenetic tree based on 45 nuclear markers [43]. Pie charts show the probability of three fertilization types in nodes, and asterisks indicate statistically significant types.
