# Supplementary material for: Variations in the breeding behavior of cichlids and the evolution of the multi-functional seminal plasma protein, seminal plasma glycoprotein 120
Source: Springer Nature journal article supplement (doi:10.1186/s12862-018-1292-0), 2018-12-01
Supplement: 12862_2018_1292_MOESM8_ESM.pdf [file 12862_2018_1292_MOESM8_ESM.pdf]

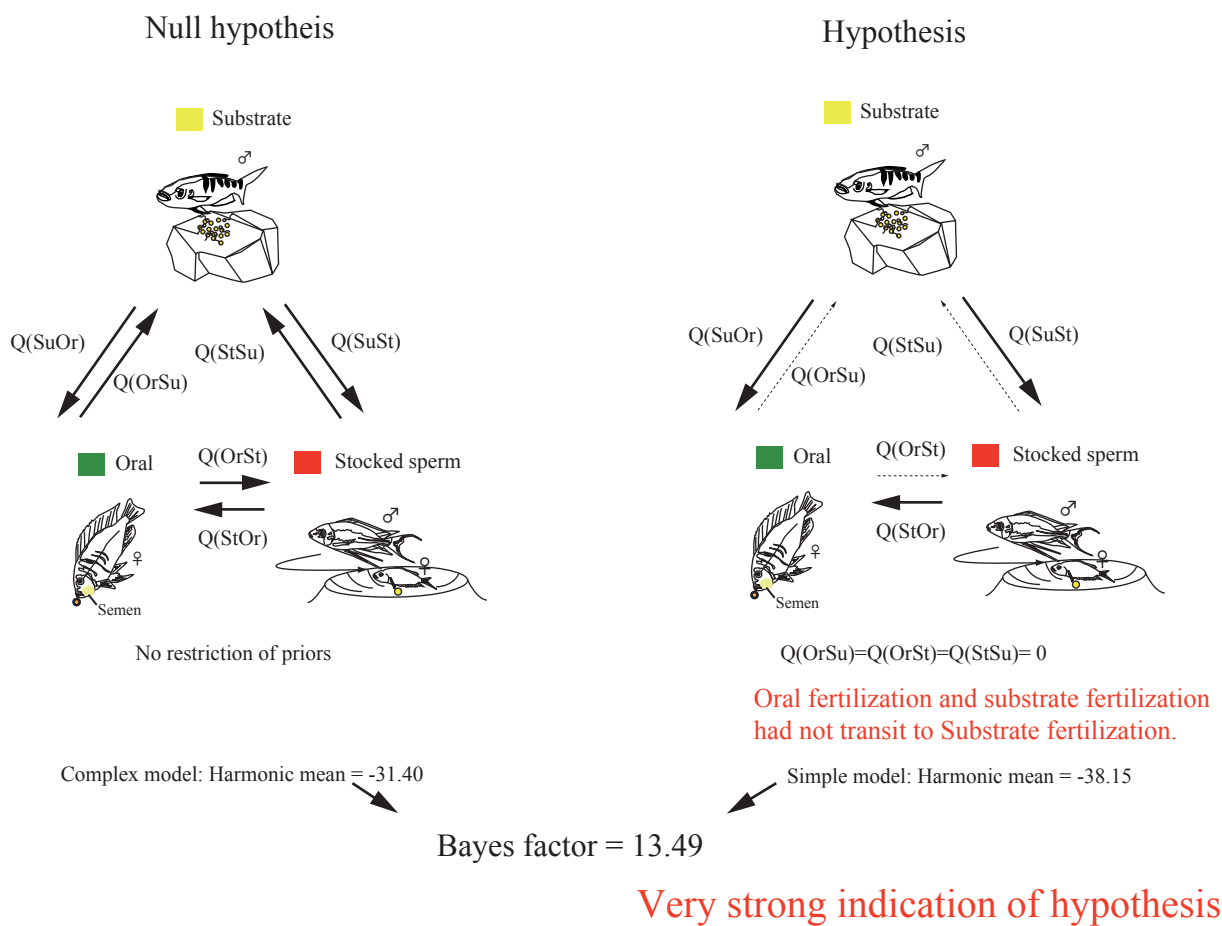

Bayes factor =  $-2 * (\text{harmonic mean}[\text{complex model}] - \text{haemonic mean}[\text{simple model}])$

>2: positive, >5: Strong, >10: Very strong

**Figure S2 Evolutionary transition of fertilization types by restirction of BayesTraits**
