# Supplementary material for: Variations in the breeding behavior of cichlids and the evolution of the multi-functional seminal plasma protein, seminal plasma glycoprotein 120
Source: Springer Nature journal article supplement (doi:10.1186/s12862-018-1292-0), 2018-12-01
Supplement: 12862_2018_1292_MOESM9_ESM.pdf [file 12862_2018_1292_MOESM9_ESM.pdf]

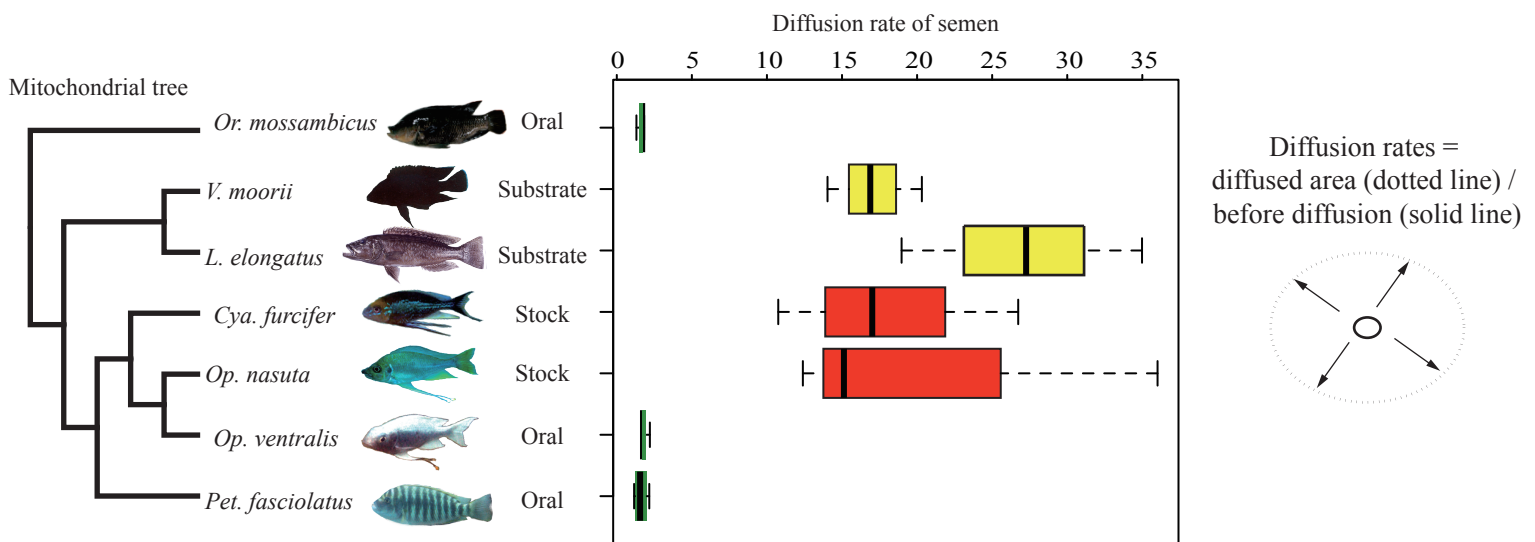

**Figure S3 Diffusion of semen in several species**

Diffusion rates of semen in terms of fertilization type. Oral fertilization type is following species; *Or. mossambicus* (N=3), *Pet. fasciolatus* (N=4), and *Op. ventralis* (N=4), Bower-building species (stocked-sperm fertilization) are *Cy. furcifer* (N=3) and *Op. nasuta* (N=3), substrate fertilization species are *V. moorii* (N=3), and *L. elongatus* (N=3)
