# Supplementary material for: Variations in the breeding behavior of cichlids and the evolution of the multi-functional seminal plasma protein, seminal plasma glycoprotein 120
Source: Springer Nature journal article supplement (doi:10.1186/s12862-018-1292-0), 2018-12-01
Supplement: 12862_2018_1292_MOESM11_ESM.pdf [file 12862_2018_1292_MOESM11_ESM.pdf]

*Petrochromis fasciolatus*  
(fertilization in buccal cavity)

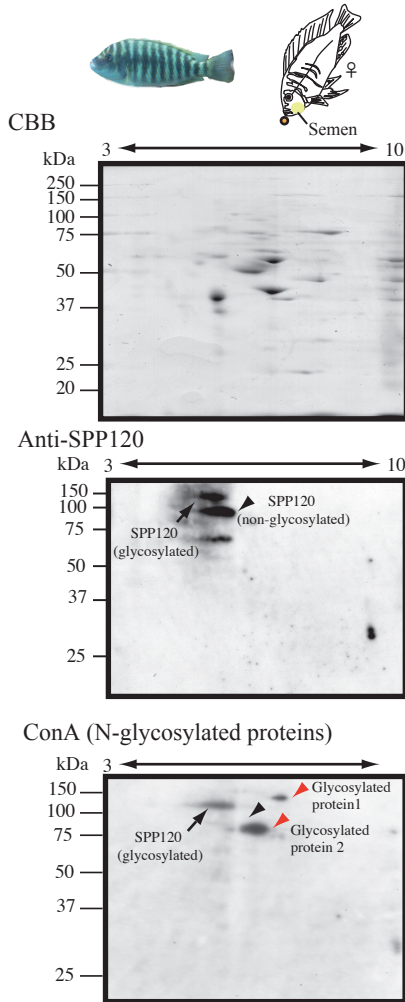

*Cyathopharynx furcifer*  
(Stocked sperm fertilization)

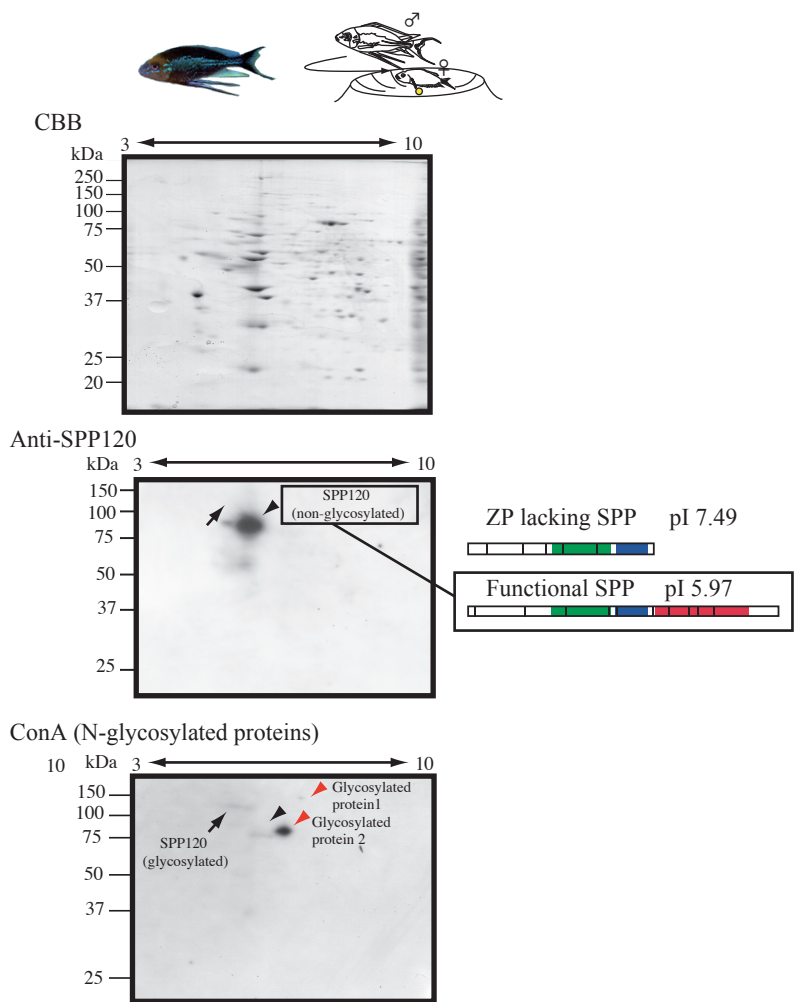

**Figure S4. Glycosylated proteins, SPP120 positive spots, and CBB staining of testes of the oral fertilization species *Petrochromis fasciolatus*, and the stocked-sperm fertilization species *Cyathopharynx furcifer***
