# Supplementary material for: Variations in the breeding behavior of cichlids and the evolution of the multi-functional seminal plasma protein, seminal plasma glycoprotein 120
Source: Springer Nature journal article supplement (doi:10.1186/s12862-018-1292-0), 2018-12-01
Supplement: 12862_2018_1292_MOESM13_ESM.pdf [file 12862_2018_1292_MOESM13_ESM.pdf]

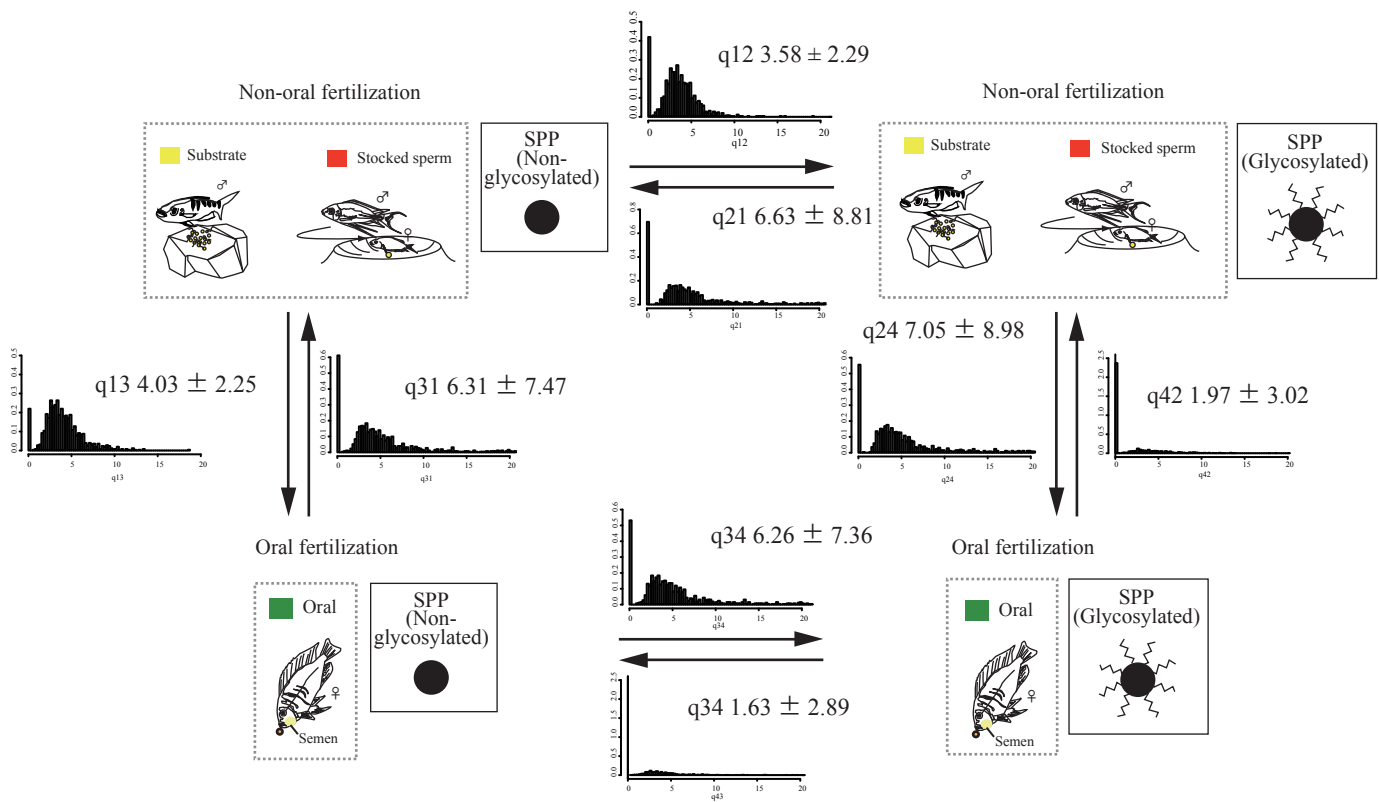

**Figure S5 Evolutionary transition of oral fertilization and glycosylation of SPP120**
