# Supplementary material for: Variations in the breeding behavior of cichlids and the evolution of the multi-functional seminal plasma protein, seminal plasma glycoprotein 120
Source: Springer Nature journal article supplement (doi:10.1186/s12862-018-1292-0), 2018-12-01
Supplement: 12862_2018_1292_MOESM27_ESM.pdf [file 12862_2018_1292_MOESM27_ESM.pdf]

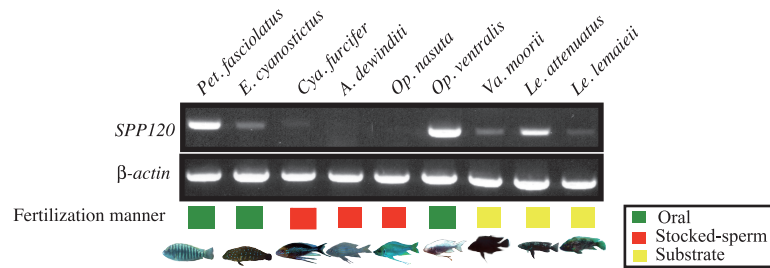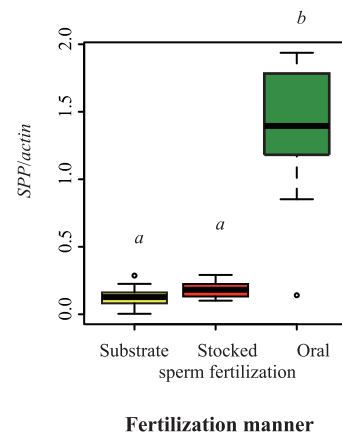

PGLS : supplementary table 8 a vs b :  $P < 0.005$

Supplementary Figure 10. *SPP120* expressions in the testes
